# Supplementary material
Source: publisher figshare collection journal article supplement (https://karger.figshare.com/ndownloader/files/35099698)
Supplement: Supplementary file 1 [file 35099698]

**Supplementary Materials**

Supplementary Fig. S1.Visualization of a correlation matrix. At the top: the (absolute) value of the Spearman’s correlation coefficients and the result of the test for the association between paired samples as stars (•; p<0.1, *; p<0.05, **; p<0.01, ***; p<0.001). At the bottom: the bivariate scatterplots with a fitted line. Spearman’s correlation coefficients were >0.4 among the responsiveness of subjective scales at 12 weeks, namely the VAS (vs. POEM: r=0.42, vs. 5D: r=0.47, and vs. Skindex-16: r=0.51, all p<0.05), POEM (vs. 5D: r=0.73, vs. Skindex-16: r=0.79, both p<0.00001), 5D (vs. Skindex-16: r=0.77, p<0.00001), and Skindex-16 (Supplementary Figure 1). Correlations among the responsiveness of the EASI score and the abovementioned subjective symptom scales were not significant. The change in the IL-31 level positively correlated with the responsiveness of POEM (r=0.38, p=0.047) and Skindex-16 (r=0.41, p=0.031), unlike that of the 5D scale and VAS. In addition, the serum DAO value at 0 weeks was positively correlated with the degree of change in the IL-31 level (r=0.50, p=0.0078) and the responsiveness of POEM (r=0.42, p=0.025), implying that patients with a lower DAO value at 0 weeks experienced a larger reduction in the serum IL-31 level and the POEM score. The degree of changes in anti-zonulin IgA positively correlated with the degree of changes in IL-31 (r=0.51, p=0.0052) and the degree of changes in anti-zonulin IgG (r=0.62, p=0.00046). The degree of changes in anti-zonulin IgG positively correlated with the responsiveness of 5D (r=0.59, p=0.00099) and Skindex-16 (r=0.49, p=0.0083). The responsiveness of POEM also positively correlated with changes in the peripheral eosinophil count (r=0.43, p=0.023). The responsiveness of VAS positively correlated with the serum TARC value at 0 weeks (r=0.38, p=0.044). In contrast, the responsiveness of EASI negatively correlated with changes in the peripheral eosinophil count (r=-0.39, p=0.040) and the serum LDH level at 0 weeks (r=−0.38, p=0.049), implying that patients with a greater increase in the peripheral eosinophil count or higher LDH level at 0 weeks experienced a greater reduction in the EASI score. The distribution of the responsiveness of the EASI score was skewed due to a lower initial EASI score, and it was possibly affected by several outliers (such as participants with higher initial EASI scores) with a larger degree of change after 12 weeks. We found positive correlations between the IgE level, LDH level, TARC, eosinophil count, and EASI; however, no clear correlation was found between the degree of change before and after herbal medicine treatment.

Supplementary Fig. S2.Alterations in each observation item for changes in each participant. Compared to their initial values, the scores of all subjective symptom scales, namely the VAS, POEM, 5D, and Skindex-16, improved significantly after four (p<0.01 for all scales), eight (p<0.01 for all scales), and 12 weeks (p<0.0001 for all scales) of intervention.

VAS, visual analog scale; POEM, patient-oriented eczema measure; 5D, 5-D itch scale; EASI, eczema area and severity index

Supplementary Fig. S3.Alterations in each observation item for changes in each participant. Compared to their initial values, the total EASI score improved significantly after four (p<0.0001), eight (p<0.001), and 12 weeks (p<0.00001) of intervention. There were no significant changes in the total IgE level, LDH level, and peripheral eosinophil count.

EASI, eczema area and severity index; IgE, immunoglobulin E; LDH, lactate dehydrogenase; Eosino, eosinophil count

Supplementary Fig. S4.Alterations in each observation item for changes in each participant. The serum IL-31 and anti-zonulin IgA levels were significantly lower at 12 weeks than at 0 weeks (p=0.030 and 0.036, respectively). There were no significant changes in the zonulin, TARC, DAO, and anti-zonulin IgG levels.

IL-31, interleukin 31; TARC, thymus and activation-regulated chemokine; DAO, diamine oxidase

Supplementary Table S1. The selected Kampo formulas at the first consultation

Supplementary Table S2. Observation items and crude drugs
